# Supplementary figures and images for: Glycolysis is integral to histamine‐induced endothelial hyperpermeability
Source: PubMed Central journal article supplement — FASEB J. 2021 Feb 10;35(3):e21425. doi: 10.1096/fj.202001634R (PMC7909462; doi:10.1096/fj.202001634r), 2021-02-10

# FIGURE S1

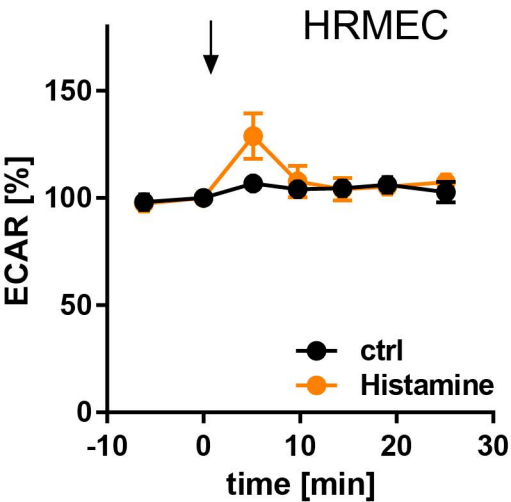

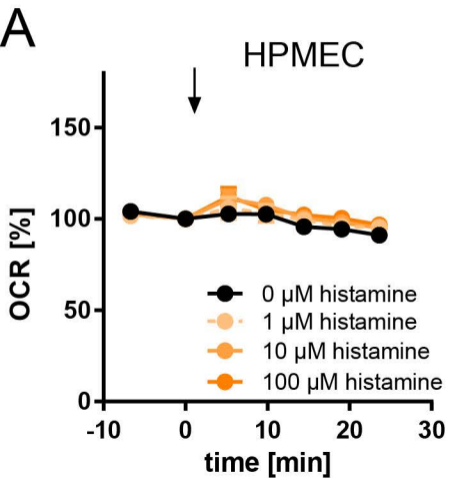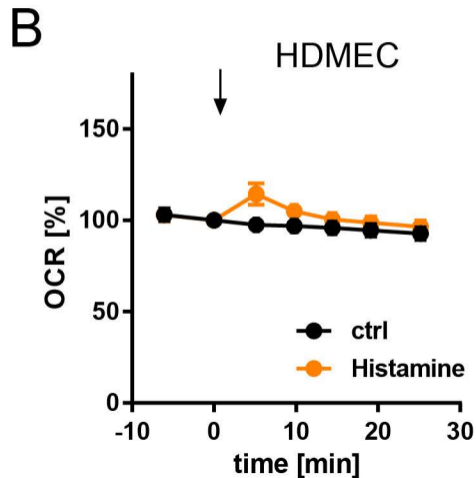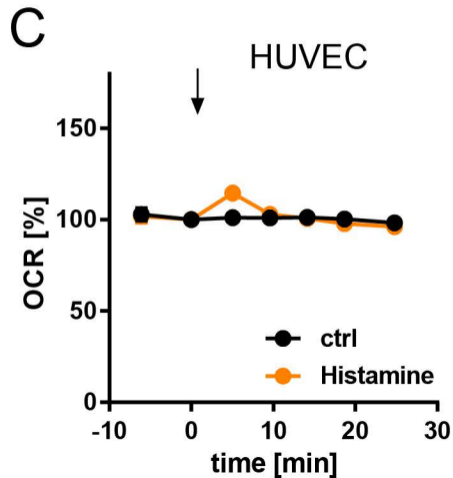

# FIGURE S3

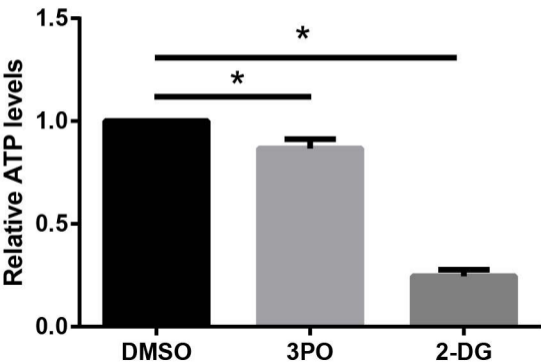

**FIGURE S4**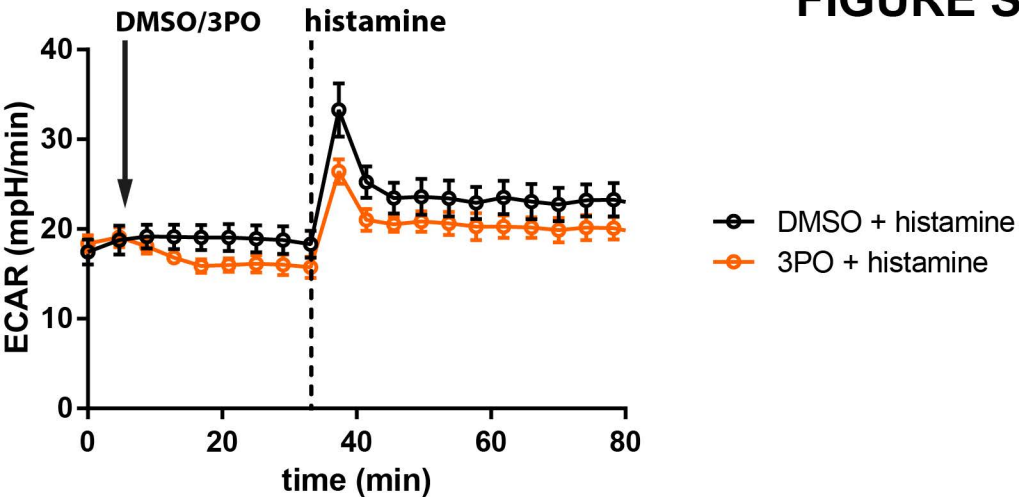

**FIGURE S5**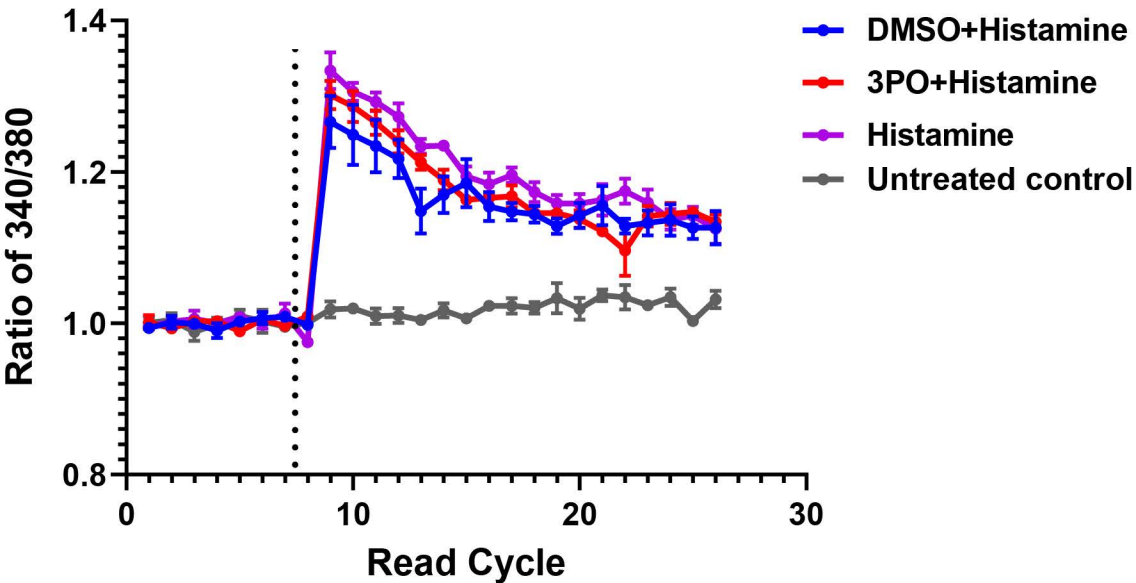

Supplement: NIHMS1667231-supplement-FIG_S1-S5.pdf [file NIHMS1667231-supplement-FIG_S1-S5.pdf]
